# Supplementary material
Source: PubMed Central journal article supplement (PMC6125963)

Supplemental figure 1. Flow chart of FUTURE study young stroke population.

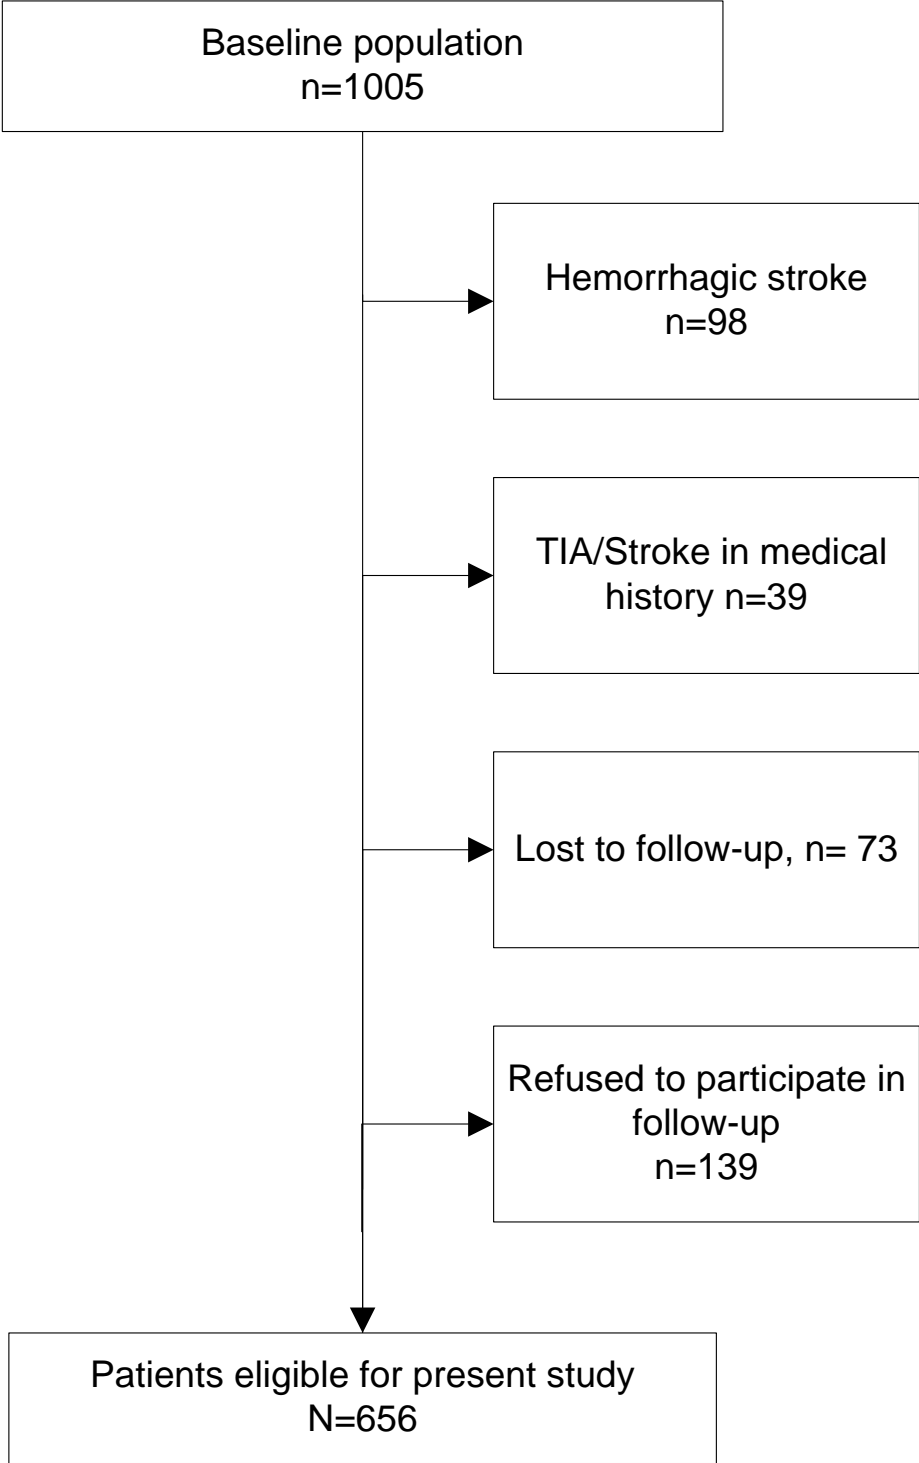

Supplement: JCB707138_supplementary_material.pdf [file JCB707138_supplementary_material.pdf]
